# Supplementary material for: Tuning the collective switching behavior of azobenzene/Au hybrid materials: flexible versus rigid azobenzene backbones and Au(111) surfaces versus curved Au nanoparticles
Source: Royal Society of Chemistry journal article supplement (doi:10.1039/c7nr03421k), 2017-01-01
Supplement: c7nr03421k1.pdf [file c7nr03421k1.pdf]

**Supporting information for**  
**Tuning the collective switching behavior of azobenzene/Au**  
**hybrid materials: flexible versus rigid azobenzene backbone**  
**and Au(111) surface versus highly curved nanoparticle**

Chunyan Liu, Dong Zheng, Weigang Hu, Qiang Zhu, Ziqi Tian, Jun Zhao, Yan Zhu\*

and Jing Ma\*

Key Laboratory of Mesoscopic Chemistry of MOE, School of Chemistry & Chemical Engineering,  
Nanjing University 22 Hankou Road, Nanjing, 210093, People's Republic of China

List of content

|                                                                                                                             |     |
|-----------------------------------------------------------------------------------------------------------------------------|-----|
| 1. The potential energy curve of inversion path and comparison of the calculated spectra with experiment .....              | S2  |
| 2. Experiments of F-AB and A <sub>25</sub> @F-AB.....                                                                       | S3  |
| 3. The potential energy curve of biphenyl torsion angle .....                                                               | S5  |
| 4. The Au <sub>center</sub> -C <sub>top</sub> distance along MD trajectory of single Au@AB system .....                     | S6  |
| 5. The standard deviation of C-N=N-C dihedral of diverse Au@AB SAMs systems.....                                            | S7  |
| 6. The time evolution of order parameter during the switching process of six Au@AB monolayers.....                          | S8  |
| 7. The trajectory of the average C-N=N-C torsion angle of single R-AB within NAMD and CHARMM36.....                         | S9  |
| 8. The trajectory of the average C-N=N-C torsion angle of single R-AB under potential energy based switching functions..... | S10 |

1. Potential energy curve of inversion path and comparison of the calculated spectra with experiment

(a)

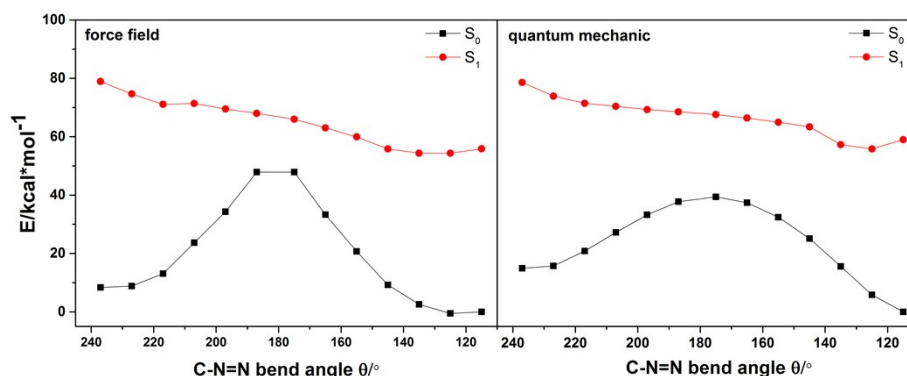

(b)

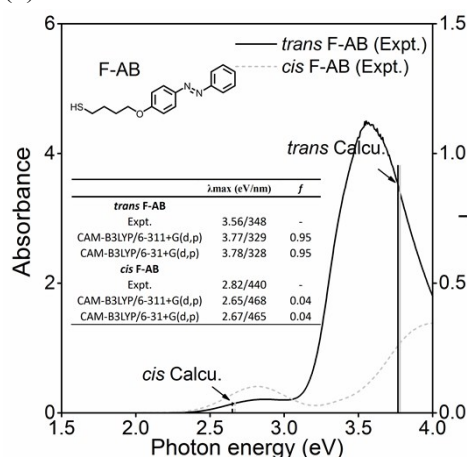

(c)

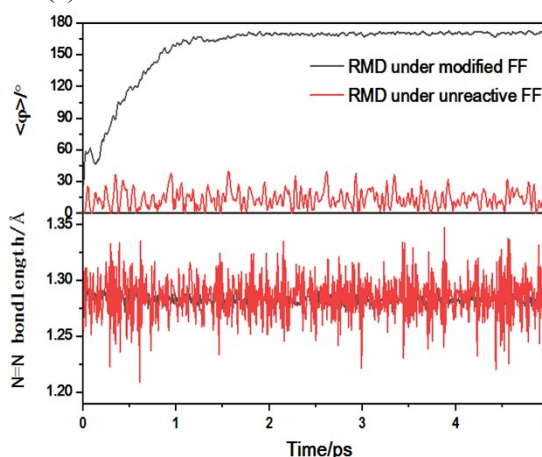

Figure S1. (a) Potential energy curve along the inversion path for azobenzene under the quantum mechanics and force fields; (b); comparison made between the calculated spectra (column) and experimental UV-Vis spectra (curve, concentration:  $4.0 \times 10^{-6} \text{M}$ ) of *trans* or *cis* F-AB; and the TDDFT computational levels are CAM-B3LYP/6-311+G(d,p) and CAM-B3LYP/6-31+G(d,p), respectively. (c) illustration of the unreactive *versus* reactive MD trajectories.

Under default parameters on C-N=N-C torsion term and C-N=N bend term within various classical force fields (such as CVFF, PCFF, CHARMM36), the switching behavior of azobenzene is not observed, illustrated as the following dynamic process (red lines in Figure S1c) of a single R-AB in gas phase. Hence, the default parameters is described as "unreactive".

Based on the accurate C-N=N-C torsion and C-N=N bend potential energy curve through QM calculation (Figure S1a), the corresponding parameter is properly modified within standard forcefield framework and reproduce the potential energy curve. After the modification, the successful switching behavior (black lines in Figure S1c) of azobenzene is well described. During the switching process from *cis* to *trans*, the N=N bond demonstrates minor change and do not involve bond breaking. Compared to results under default forcefield, the modified one is "reactive".

## 2. Experiments of F-AB and A<sub>25</sub>@F-AB

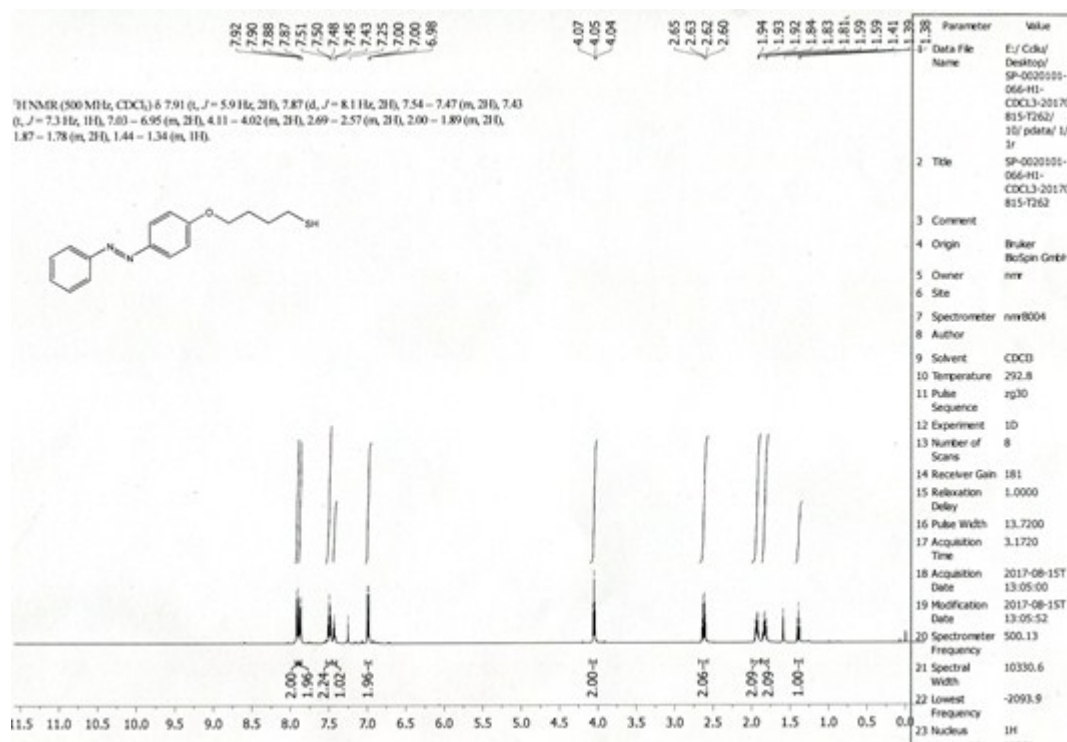

Figure S2. <sup>1</sup>H nuclear magnetic resonance (NMR) spectrum of F-AB (also called Az-SH in literature), NMR analysis was conducted on Bruker Biospingmb1 spectrometer. The data was collected with a sample in CDCl<sub>3</sub>.

The kinetics of thermal *cis-to-trans* relaxation is calculated from Eq. S1

$$\ln \frac{A_0 - A_\infty}{A_t - A_\infty} = k_r \times t \quad (\text{S1})$$

Where  $k_r$  is the rate constant of the *cis-to-trans* thermal relaxation and  $t$  is the reaction time. The values of  $A_0$ ,  $A_t$ , and  $A_\infty$  are the absorbances corresponding to the time 0 (in *cis* form),  $t$ , and photo-stationary state ( $\infty$ ), as shown in Fig. 2c and 2d. The results are shown in Figure S3. The thermal isomerization of F-AB in A<sub>25</sub>@F-AB is slightly slower than that of free F-AB with a relative isomerization time ratio of 1.1.

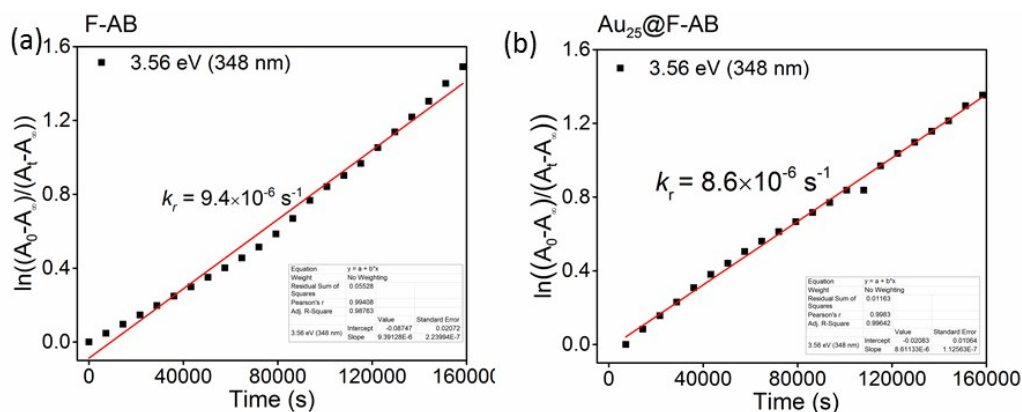

Figure S3. First-order kinetics of thermal *cis-to-trans* isomerizations of (a) F-AB and (b) Au<sub>25</sub>@F-AB in dichloromethane solution at room temperature

Table S1 Activation energies ( $E_a$ ), pre-exponential factor ( $A$ ), and first-order kinetic rate constant ( $k_r$ ) for *cis-to-trans* thermal isomerizations of different azobenzene (AB) derivatives

| AB-derivatives                                   | $E_a$<br>(kJ/mol) | $A$<br>(s <sup>-1</sup> )          | $K_r$<br>(s <sup>-1</sup> )       | Isomerization<br>time ratio |
|--------------------------------------------------|-------------------|------------------------------------|-----------------------------------|-----------------------------|
| Free AB@gas                                      | 66.9              |                                    |                                   |                             |
| Free AB-CONH <sub>2</sub> @solution <sup>a</sup> | 90.0 <sup>a</sup> | $1.56 \times 10^{10}$ <sup>a</sup> | $2.1 \times 10^{-6}$ <sup>a</sup> |                             |
| Free F-AB@solution                               | 90.0 <sup>a</sup> | $5.61 \times 10^{10}$              | $9.4 \times 10^{-6}$              | 1.0                         |
| Au <sub>25</sub> @F-AB@solution                  | 90.0 <sup>a</sup> | $5.14 \times 10^{10}$              | $8.6 \times 10^{-6}$              | 1.1                         |

<sup>a</sup> Data taken from Ref: S. Samai, D. J. Bradley, T. L. Y. Choi, Y. Yan and D. S. Ginger, *J. Phys. Chem. C*, 2017, **121**, 6997-7004.

3. The potential energy curve of biphenyl torsion angle in R-AB

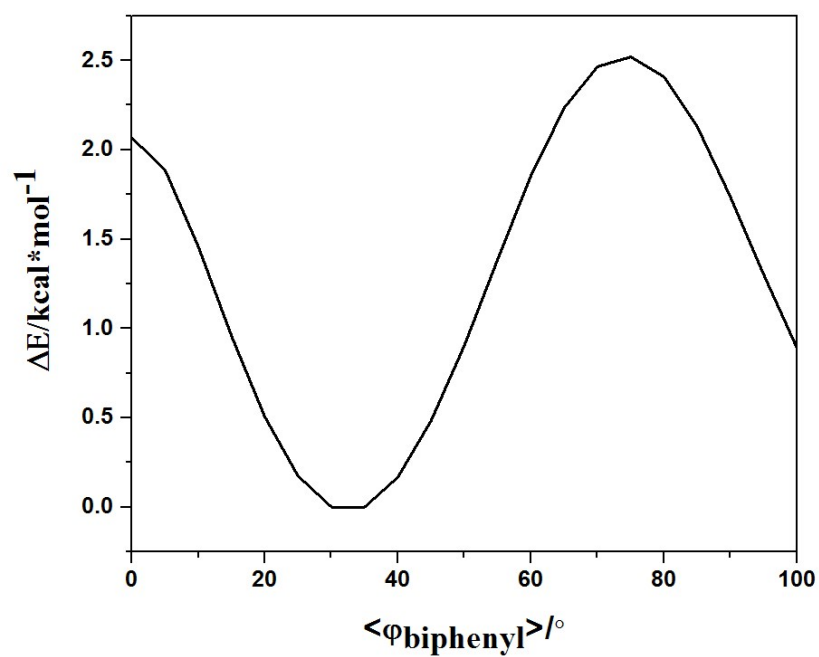

Figure S4. The potential energy curve of biphenyl torsion angle in R-AB

#### 4. Time evolution of $\text{Au}_{\text{center}}\text{-C}_{\text{top}}$ distance along MD trajectory of single $\text{Au@AB}$ system

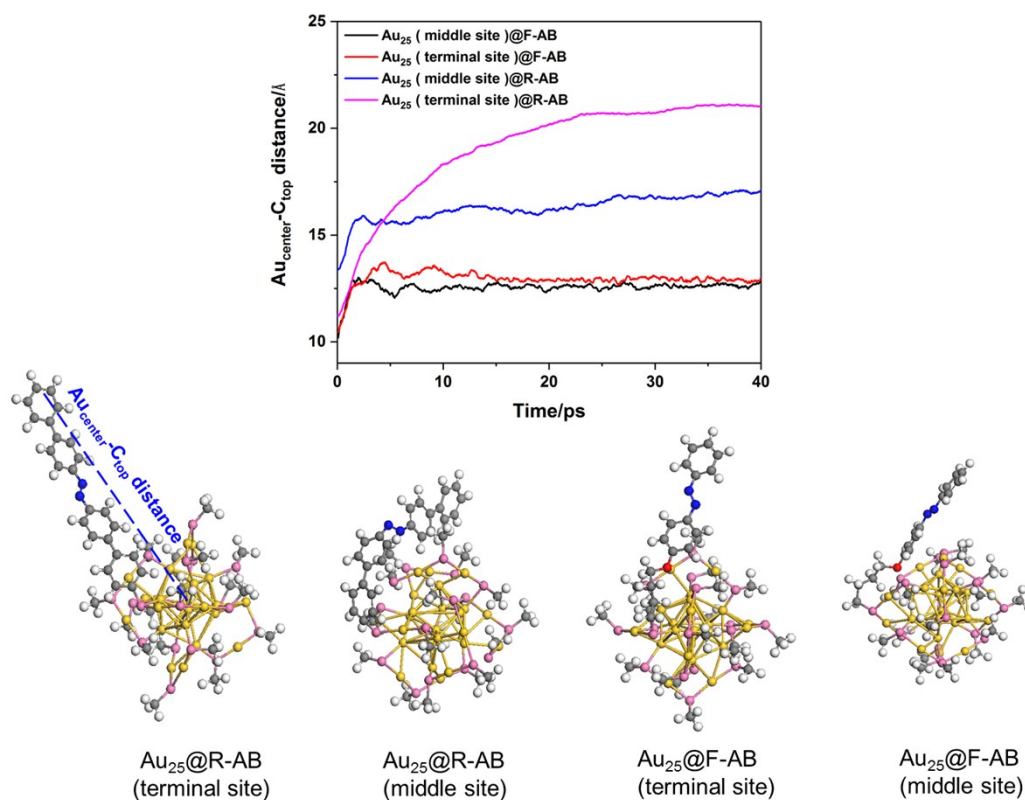

Figure S5. Time evolution of  $\text{Au}_{\text{center}}\text{-C}_{\text{top}}$  distance along MD trajectory of single  $\text{Au@AB}$  system.

5. The standard deviation of C-N=N-C dihedral of diverse Au@ AB SAMs systems

$$\text{the standard deviation} = \sqrt{\frac{1}{N} \sum_{i=1}^N (\varphi_i - \langle \varphi \rangle)^2}$$

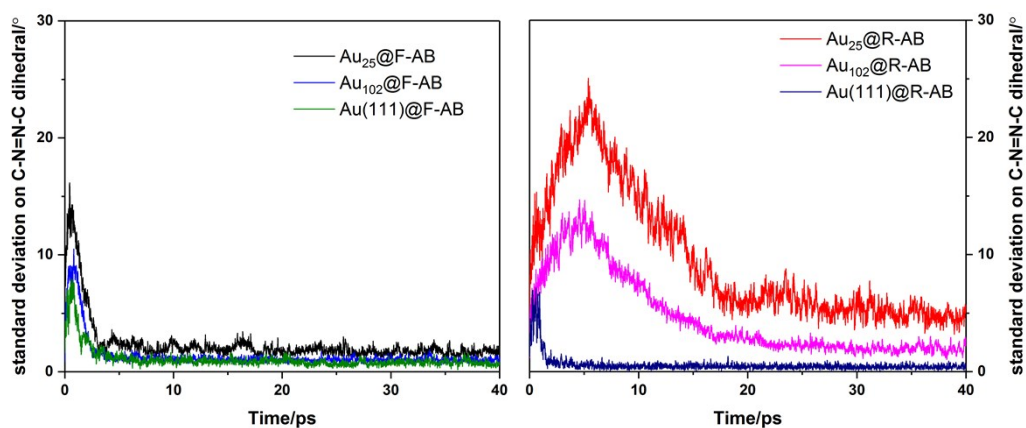

Figure S6. The standard deviation of C-N=N-C dihedral of diverse Au@ AB SAMs systems

6. The time evolution of order parameter during the switching process of six Au@AB monolayers

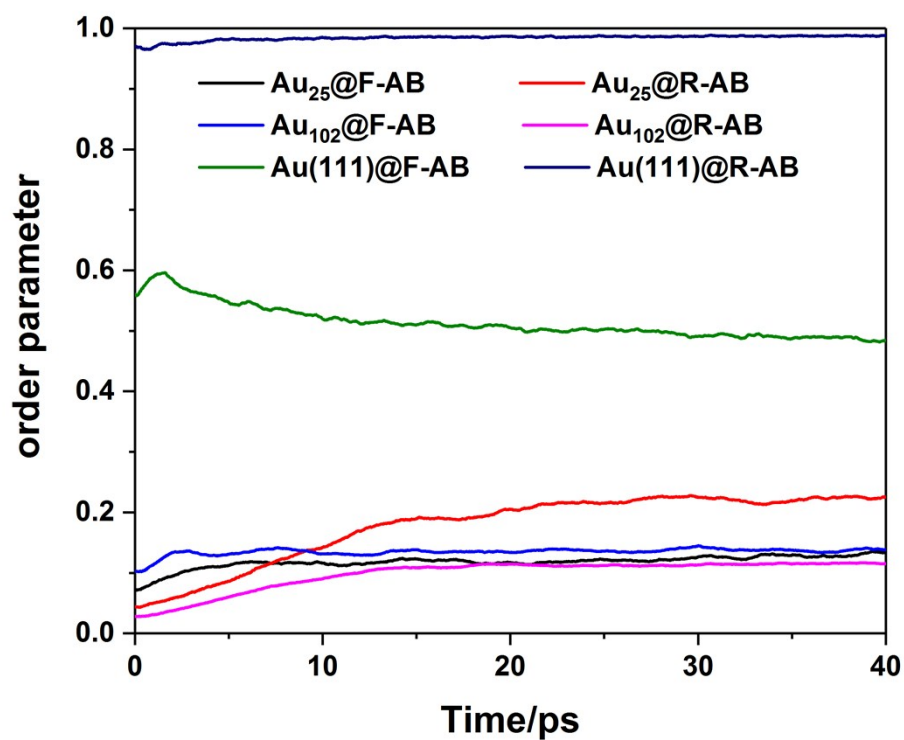

Figure S7. The trajectory of order parameter during the switching process of six azobenzene self-assembly monolayer on Au substrate

7. The trajectory of the average C-N=N-C torsion angle of single R-AB within NAMD and



CHARMM36.

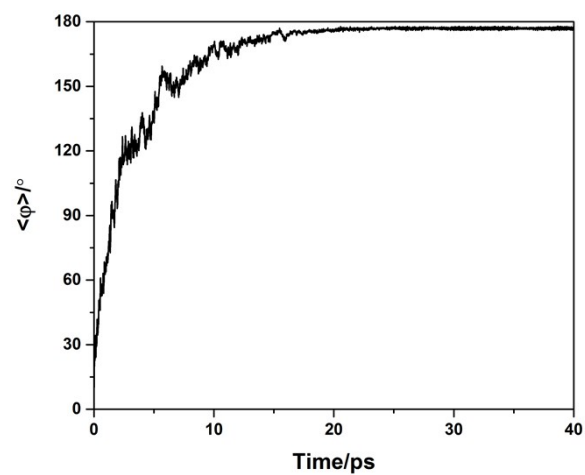

Figure S8. The trajectory of the average C-N=N-C torsion angle of single R-AB within NAMD and CHARMM36.

8. The trajectory of the average C-N=N-C torsion angle of single R-AB under potential energy

based switching functions

A different switch model, quoted from the reference 31 and based on the energy difference between  $S_1$  and  $S_0$ , is also implemented in nonadiabatic simulation of azobenzene. The transition probability is defined as

$$P = \kappa e^{\chi(E_{S_1} - E_{S_0})} + P_{ini}$$

Table S2. The quantum yields for different variable sets of energy-based switching function

|      | K   | $\chi$ | $P_{ini}$ | Quantum yield |
|------|-----|--------|-----------|---------------|
| Set1 | 3.0 | -0.2   | 0         | 0.20          |
| Set2 | 3.0 | -0.1   | 0         | 0.36          |
| Set3 | 1.3 | -0.1   | 0.2       | 0.74          |
| Set4 | 1.3 | -0.1   | 0.1       | 0.60          |

Four different variable sets are explored. Set1 and Set2 are the same as the ones in reference 31, whilst the Set3 and Set4 are newly defined. Fifty independent simulations are performed for each set. The average C-N=N-C dihedral trajectories are shown as Figure S9, in which the quick back-and-forth switches are found. It should be mentioned that the results obtained from the potential energy based switching functions are highly sensitive to the variables. With the increase of  $K$ ,  $\chi$ , and  $P_{ini}$ , the quantum yields become higher and the final *trans* conformation is more planar.

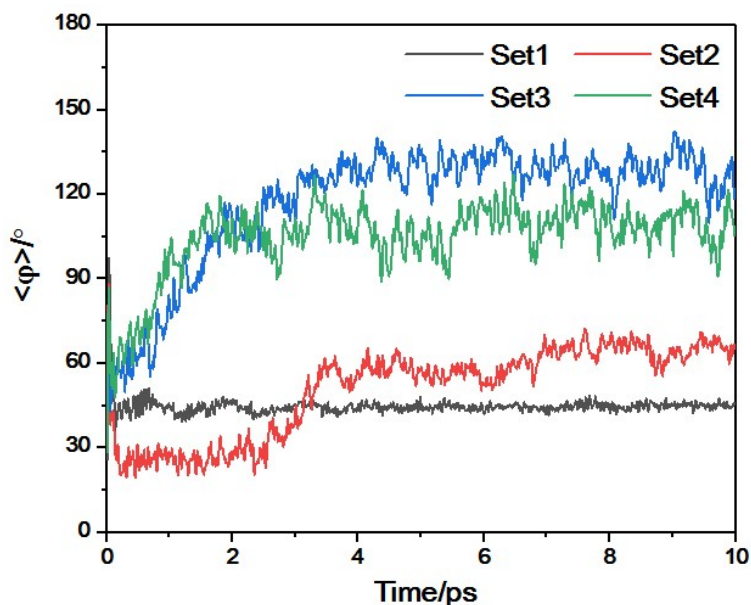

Figure S9. The trajectory of the average C-N=N-C torsion angle of single R-AB under potential energy based switching functions with different variable sets.
